# Supplementary material for: Structural basis for defective membrane targeting of mutant enzyme in human VLCAD deficiency
Source: PubMed Central journal article supplement (PMC9237092; doi:10.1038/s41467-022-31466-2), 2022-06-27
Supplement: 41467_2022_31466_MOESM2_ESM.pdf [file 41467_2022_31466_MOESM2_ESM.pdf]

### **Description of Additional Supplementary Files**

File Name: Supplementary Data 1

Description: Comprehensive experimental details and parameters, proteolytic maps for all proteins, and the raw numeric values used to generate HDX MS figures.
